# Supplementary material for: Patient-reported outcome measures for hip-related pain: a review of the available evidence and a consensus statement from the International Hip-related Pain Research Network, Zurich 2018
Source: HighWire-hosted journal article supplement (doi:10.1136/bjsports-2019-101456), 2020-02-17
Supplement: bjsports-2019-101456supp002_data_supplement.xlsx [file bjsports-2019-101456supp002_data_supplement.xlsx]

## Sheet: SummaryHAGOS
HAGOS	Country (language)	Structural validity				Internal consistency				Cross-cultural validity*				Reliability				Measurement error**				Hypotheses testing				Responsiveness				Floor ceiling effect
		n	Meth. Qual.	Results (rating)	Notes	n	Meth. Qual.	Results (rating)	Notes	n	Meth. Qual.	Results (rating)	Notes	n	Meth. Qual.	Results, ICC (rating)	Notes	n	Meth. Qual.	Results: SEM, SDC, MIC (rating)	Notes	n	Meth. Qual.	Results (rating)	Notes	n	Meth. Qual.	Results (rating)	Notes
Thorborg et al, 2011	Denmark (Danish)	101	Inadequate (EFA on single subscales and no CFA or EFA on the whole scale)	Eigenvalue=3.2 (46% variance explained, VE) (? , no fit indices)	Symptoms	44	Very good (for each subscale)	0.79 (+)	Symptoms					44	Very good	0.86 (+)	Symptoms	44	Very good	6.4, SDC 17.7, MIC 10.1 (-)	Symptoms	101	Very good	5 hyp confirmed (+), 1 not confirmed (-)	Ref for convergence: SF36	87	Very good	8 hyp confirmed (+)	1 hyp for each subscale	No
				Eigenvalue=5.6 (56% VE) (?)	Pain			0.91 (+)	Pain							0.89 (+)	Pain			6.8, SDC 18.8, MIC 9.9 (-)	Pain									No
				Eigenvalue=3.3 (66% VE) (?)	ADL			0.87 (+)	ADL							0.91 (+)	ADL			7.2,SDC 20.0, MIC 11.6 (-)	ADL									Ceiling post surgery (19%)
				Eigenvalue=5.3 (66% VE) (?)	Sport/Rec			0.93 (+)	Sport/Rec							0.91 (+)	Sport/Rec			8.0, SDC 22.2, MIC 13.6 (-)	Sport/Rec									No
				Eigenvalue=1.8 (66% VE) (?)	PA			0.87 (+)	Participation in PA							0.82 (+)	Participation in PA			12.2, SDC 33.8, MIC 17.1 (-)	PA									Floor pre and post (39 and 28%)
				Eigenvalue=2.9 (46% VE) (?)	QOL			0.81 (+)	QOL							0.84 (+)	QOL			6.4, SDC 17.7, MIC 11.7 (-)	QOL									No
Kemp et al. 2013	Australia (English)					50	Very good (for each subscale)	0.94 (+)	Symptoms	50	Adequate	+		50	Adequate	0.97 (+)	Symptoms	50	Adequate	3, SDC 8, MIC 10 (-)	Symptoms	50	Very good	3 hyp confirmed (+)	Ref for convergence: SF36	45	Very good	9 hyp confirmed (+), 3 hyp not confirmed (-)	we considered 1 hyp for each subscale	No
								0.97 (+)	Pain							0.94 (+)	Pain			4, SDC 12, MIC 6 (-)	Pain									No
								0.93 (+)	ADL							0.93 (+)	ADL			5, SDC 14, MIC 9 (-)	ADL									Ceiling post (32%)
								0.97 (+)	Sport/Rec							0.95 (+)	Sport/Rec			5, SDC 15, MIC 9 (-)	Sport/Rec									Ceiling post (16%)
								0.96 (+)	PA							0.96 (+)	PA			6, SDC 18, MIC 1 (-)	PA									Ceiling post (28%)
								0.92 (+)	QOL							0.92 (+)	QOL			7, SDC 19, MIC 9 (-)	QOL									No
Thomee et al. 2014	Sweden (Swedish)	502	Inadequate (EFA on single subscales and no CFA on the whole scale) - No evidence of strucure from the lit can be used	Eigenvalue=3.1 (45% variance explained, VE) (?, no fit indices)	Symptoms	502	Very good (for each subscale)	0.77 (+)	Symptoms	502	Very good	+	Slight diffs: undergoing arthroscopy, wider age range (15-75 yrs)	26	Adequate	0.81 (+)	Symptoms	26	Adequate	3, SDC 8.3, MIC 9.5 (-)	Symptoms	495	Very good	7 hyp confirmed (+), 1 hyp not confirmed (-)	Ref for convergence: EQ5D, iHOT12	495	Very good	2 hyp confirmed (+)		No
				Eigenvalue=5.1 (51% VE) (?)	Pain			0.88 (+)	Pain							0.83 (+)	Pain			3.0, SDC 8.3, MCI 9.5 (-)	Pain									No
				Eigenvalue=3.5 (70% VE) (?)	ADL			0.89 (+)	ADL							0.87 (+)	ADL			4.9, SDC 13.6, MIC 11.8 (+)	ADL									Ceiling (16.9% post)
				Eigenvalue=4.6 (57% VE) (?)	Sport/Rec			0.89 (+)	Sport/Rec							0.81 (+)	Sport/Rec			4.5, SDC 12.5, MIC 13.1 (+)	Sport/Rec									No
				Eigenvalue=1.7 (86% VE) (?)	PA			0.84 (+)	PA							0.81 (+)	PA			5.8, SDC 16.1, MIC 16.9 (-)	PA									Floor (31.5% pre, 21.9% post)
				Eigenvalue=3.0 (60% VE) (?)	QOL			0.83 (+)	QOL							0.85 (+)	QOL			2.8, SDC 7.8, MIC 12.1 (-)	QOL									No
Hinman et al, 2014	Australia (English0									23	Inadequate	-		23	Adequate	0.91 (+)	Symptoms	23	Adequate	5.8, SDC 16.0, MIC Lit. (-)	Symptoms									NA
																0.94 (+)	Pain			5.5, SDC 15.3, MIC Lit. (-)	Pain									NA
																0.90 (+)	ADL			7.7, SDC 21.3, MIC Lit. (-)	ADL									NA
																0.89 (+)	Sport/Rec			7.9, SDC 21.9, MIC Lit. (-)	Sport/Rec									NA
																0.79 (+)	PA			8.0, SDC 22.3, MIC Lit. (-)	PA									NA
																0.85 (+)	QOL			6.5, SDC 18.1, MIC Lit. (-)	QOL									NA
Brans et al. 2016	Netherland (Dutch)		Inadequate (CFA declared but EFA used on single subscales and not on all items) - No previous reference EFA or CFA	Eigenvalue= 4.4 (62% VE) - ? (no fit indices)	Symptoms	246 (not clear: sample should be n=178)	Very good (? Structure)	0.90 (+)	Symptoms	178	Inadequate	-		246 (?)	Adequate	0.78 (+)	Symptoms	79	Adequate	9 (?)	Symptoms	178	Very good	Most of the hypotheses confirmed (+)	SF36, SFMA
				Eigenvalue=6.9 (68% VE) (?)	Pain			0.94 (+)	Pain							0.80 (+)	Pain			8 (?)	Pain
				Eigenvalue=4.0 (79% VE) (?)	ADL			0.93 (+)	ADL							0.76 (+)	ADL			10 (?)	ADL
				Eigenvalue=6.8 (86% VE) (?)	Sport/Rec			0.98 (+)	Sport/Rec							0.79 (+)	Sport/Rec			11 (?)	Sport/Rec
				Eigenvalue=1.9 (93% VE) (?)	Participation in PA			0.92 (+)	Participation in PA							0.63 (+)	Participation in PA			16 (?)	Participation in PA
				Eigenvalue=4.0 (79% VE) (?)	QOL			0.93 (+)	QOL							0.86 (+)	QOL			9 (?)	QOL
SUMMARY RESULTS		603		Variance explained of each subscale from 45 to 93% - NO CFA or EFA on the whole instrument - No fit statistic (?)		596		CA from 0.77 to 0.97 (+)		575				143		ICC from 0.79 to 0.97 (+)		143		SEM from 3 to 16 (- )		646		15 hyp confirmed (+), 2 not confirmed (-)		627		19 hyp confirmed (+), 3 not confirmed (-)
Overall rating		Indeterminate (?)				Sufficient (+)				Sufficient (+)				Sufficient (+)				Insufficient (-)				Sufficient (+)				Sufficient (+)
GRADE	RoB study	Extremely serious
	Inconsistency
	Imprecision
	Indirectness
Quality of evidence		Very low				High				High				High				High				High				High
NOTE: Some studies have used an English version but it seems this EN version has been not validated but just translated
*, no studies have used two groups in the cross cultural validation; samples were compared with the sample of the developmental paper.

## Sheet: SummaryHOS
HOS	Country (language)	Structural validity				Internal consistency				Cross-cultural validity*				Reliability				Measurement error**				Hypotheses testing				Responsiveness				Floor ceiling effect
		n	Meth. Qual.	Results (rating)	Notes	n	Meth. Qual.	Results (rating)	Notes	n	Meth. Qual.	Results (rating)	Notes	n	Meth. Qual.	Results, ICC (rating)	Notes	n	Meth. Qual.	Results, SEM (rating; individual level)	Notes	n	Meth. Qual.	Results (rating)	Notes	n	Meth. Qual.	Results (rating)	Notes
Martin et al. 2006	USA (English)	430	Inadequate (EFA on single subscales but not the whole instrument: arbitrary assignment to different domains) (-)	1 factor (68% variance explained, no fit statistic) (?)	Adl	430	Very good (single subscale)	0.96 (+)	ADL													507	Adequate	2 hyp confirmed (+)	SF36					NA
		343		1 factor (80% variance explained, no fit statistic) (?)	Sport	343		0.95 (+)	Sport
Martin et al. 2007																						116	Adequate	3 hyp confirmed (+)	SF36					NA
Martin et al. 2008														18	Adequate	0.98 (+)	ADL	18	Adequate	SDC 3, MIC 9 (+)	ADL					108	Adequate	2 hyp confirmed (+)		NA
																0.92 (+)	Sport			SDC 3, MIC 6 (+)	Sport
Naal et al. 2011	Switzerland (German)					85	Very good (single subscale)	0.95 (+)	ADL	85	Inadequate	-		33	Adequate (time frame 10 days)	0.94 (+)	ADL	33	Adequate	4, SDC 11, MIC? (?)	ADL	85	Very good	5 hyp confirmed (+)	SF12, UCLA, WOMAC					No (yes if MDC taken into accunt)
								0.91 (+)	Sport							0.89 (+)	Sport			8, SDC 22, MIC? (?)	Sport
Lee et al. 2014	Korea (Korean)					60	Very good (single subscales)	0.95 (+)	ADL	60	Adequate	+		60	Doubtful (2-3 weeks time interval)	0.95 (+)	ADL					60	Very good	2 hyp confirmed (+)	SF36, HOOS	60	Inadequate (stat not appropriate)	No hypothesis tested or defined by the review team (?)		No
								0.96 (+)	Sport							0.93 (+)	Sport													No
Polat et al, 2017	Turkey (Turkish)					130	Very good (single subscales)	0.95 (+)	ADL	130	Adequate	+	Diagnosis (?)	30	Adequate (time interval, 8 days)	0.98 (+)	ADL	30	Adequate (time interval, 7-14 days)	1.6, SDC 4.3, MIC? (?)	ADL	130	Adequate	1 hyp confirmed (+), 3 hyp not confirmed (-) (hyp from the review team)	HHS, NAHS	100 (surgical)	Adequate	2 hyp confirmed (+), (hyp from the review team)		No
								0.91 (+)	Sport							0.97 (+)	Sport			0.96, SDC 2.6, MIC? (?)	Sport					30 (conservative)				No
Paula Costa et al. 2018	Brasil (Portuguese)					70	Very good (single subscales)	0.95 (+)	ADL	70	Doubtful	+		70	Doubtful (2 days, recall bias)	0.99 (+)	ADL	70	Doubtful (2 days, recall bias)	1.7, SDC 4.6, MIC? (?) - Error in the calcualtion of MIC	ADL	70	Very good	6 hyp confirmed (+), 1 hyp not confirmed (-)	SF12, NAHS					NA
								0.92 (+)	Sport							0.92 (+)	Sport			1.9, SDC 5.5, MIC? (?)	Sport									NA
Seijas et al. 2014	Spain (Spanish)					100	Very good (single subscales)	0.95 (+)	ADL	100	Adequate	+		66	Adequate (15 days time interval)	0.95 (+)	ADL	66	Adequate (15 days time interval)	5.1, SDC 13.7, MIC? (?)	ADL	100	Very good	6 hyp confirmed (+)	Refs: WOMAC	100	Very good	1 hyp confirmed (+)		No
								0.90 (+)	Sport							0.94 (+)	Sport			8.5, SDC 22.8, MIC? (?)	Sport									NO
Hinman et al, 2014	Australia (English)													30	Adequate	0.89 (+)	ADL	30	Adequate	6.4, SDC 17.8, MIC? (?)	ADL									NA
																0.82 (+)	Sport			10.4, SDC 28.9, MIC? (?)	Sport									NA
Kemp et al. 2013	Australia (English)													50	Adequate	0.95 (+)	ADL	50	Adequate	3, SDC 9, MIC 5 (-)	ADL	50	Very good	2 hyp confirmed (+), 1 hyp not confirmed (-)	SF36	45	Very good	3 hyp confirmed (+), 1 not confirmed (-)		Ceiling (16% post)
																0.96 (+)	Sport			4, SDC 13, MIC 6 (-)	Sport									No
SUMMARY RESULTS		430		Variance explained of each subscale from 68 to 80% - No fit statistic and no overall structure examined		1218		CA from 0.90 to 0.96 (+)		445		+		357		ICC from 0.82 to 0.99 (+)		297		SEM from 1.6 to 6.4 for ADL, from 1.9 to 10.4 for Sport; no MIC (?)		1118		26 hyp confirmed (+), 4 hyp not confirmed (+)		313		Hypotheses not clear (rating ?)
Overall rating		Indeterminate (?)				Sufficient (+)				Sufficient (+)				Sufficient (+)				Indeterminate (?)				Sufficient (+)				Sufficient (+)
GRADE	RoB study	Extremely serious
	Inconsistency
	Imprecision
	Indirectness
Quality of evidence		Very low				High				High				High				High				High				High

## Sheet: SummaryiHOT33
iHOT-33	Country (language)	Structural validity				Internal consistency				Cross-cultural validity*				Reliability				Measurement error**				Hypotheses testing				Responsiveness				Floor ceiling effect
		n	Meth. Qual.	Results (rating)	Notes	n	Meth. Qual.	Results (rating)	Notes	n	Meth. Qual.	Results (rating)	Notes	n	Meth. Qual.	Results, ICC (rating)	Notes	n	Meth. Qual.	Results: SEM, MIC (rating; individual level)	Notes	n	Meth. Qual.	Results (rating)	Notes	n	Meth. Qual.	Results (rating)	Notes
Mothadi et al. 2012	USA (English)	150 (?)	Inadequate	4 subscales seem to be confirmed using EFA (no results reported), but PROM score is 1 summary total score that assumes a higher-order construct (but not tested and confirmed)	Low case:item ratio for FA	50	Inadequate (not calculated on unidimensional scale or calculated on a scale which is not undimensional)	0.99 (+)				35 to 44 (no SD, no range)		50	Adequate	0.78 (+)					MIC 6.1	51	Adequate	1 hyp confirmed(+)	Ref for convergence: ENAHS	27	Adequate	NO hyp stated from the Author and no hyp defined by review team. ES 2.0, SRM 1.7, Respons Ratio 6.7 (?)		No
Polesello et al. 2012	Brasil (Portuguese)									30	Inadequate (no sample description)																			NA
Kemp et al. 2013	Australia (English)					50	Doubtful (no evidence it is possible to aggregate and generate a single score)	0.96 (+)						50	Adequate	0.93 (+)		50	Adequate	6, MIC 10 (-)		50	Very good	3 hyp confirmed (+)	Ref for convergence: SF36	45	Very good	2 hyp confirmed (+)		No
Hinman et al, 2014	Australia (English)													30	Adequate	0.93 (+)		30	Adequate	5.6, MIC literature (?)	Comparing with literature can be - or +									NA
Ruiz-Iban et al. 2015	Spain (Spanish)					97	Doubtful (no evidence it is possible to aggregate and generate a single score)	0.98 (+)		97	Very good	+		73	Adequate	0.97 (+)	Time frame acceptable, <15 days	73	Adequate	4.7, MIC literature (?)	Comparing with literature can be - or +	97	Inadequate (stat not appropriate, no correlation with iHOT total score)	1 hyp confirmed (+)	Ref for convergence: WOMAC	97	Adequate (hyp defined by the review team)	1 hyp confirmed (+)		No (yes considering MDC)
Baumann et al. 2016	Germany (German)					83	Doubtful (no evidence it is possible to aggregate and generate a single score)	0.97 (+)	Consistency of subscales and total reporteed but PROM only use total score.	83	Adequate	+		46	Doubtful (evidence of stability, time interval 2 weeks but completed after 28 days, home vs clinic, recall time different: current retest, probably last month test)	0.88 (+)		46	Doubtful (evidence of stability, time interval 2 weeks but completed after 28 days, home vs clinic, recall time different: current status for retest, probably last month for test)	8.9; MIC 10 (-)	Error in SDC calculation (Authors used the formula for group and not individual)	83	Adequate (EQ5D clear, but not sure how to apply to this population; why expected r >0.70 with a generic instrument?; HOS has 2 subscales only but 1 correlation reported)	4 hyp confirmed (+) 1 not tested	Not clear 5th hyp (Ref for convergence: EQ5D, HOS, GRC)	83	Inadequate (statistic not appropriate)	No hypotheses reported and no hypotheses could be defined by the review team (?)	The only hypothesis (SDC<MIC) is wrong (criterion for agreement and not responsiveness)	No
Tijssen et al, 2018	Netherland (Dutch)	214	Inadequate (no CFA on the whole scale)	4 factors confirmed by testing each factor separately but the PROMs has 1 total score not 4		133	Inadequate (no evidence of structural validity and whether acceptable to produce an aggregate single total score)	0.90 (+)		214	Adequate	+		133	Very good	0.92 (+)		133	Very good	6 .0, MIC 10.6 (-)		214	Very good	15 hyp confirmed (+)	Ref for convergence: EQ5D,HOOS, NPainRS					No
Li et al. 2017	China (Chinese)					138	Doubtful (no evidence it is possible to aggregate and generate a single score)	0.97 (+)		138	Adequate	+		138	Adequate	0.87 (+)	Time frame acceptbale, two weeks	138	Adequate	0.26 (error) ± 13.6 (random variation, LoA) (?)		138	Adequate (not sure WOMAC for this population)	9 hyp confirmed (+), 1 not confirmed (-)	Hypothese from the review team - Ref convergence: EQ5D, WOMAC	138	Adequate (hypothese developed by review team)	2 hyp confirmed (+)		No
SUMMARY RESULTS		364		No FA on structure of the whole scale		551		CA from 0.90 to 0.98 (+)		562		+		520		ICC 0.78 to 0.97 (+)		470		SEM 5 to 9 (-)		633		32 hyp confirmed (+), 1 not confirmed (-), 1 not tested (?)		390		5 hyp confirmed (+) and 2 studies (?)
Overall rating		Indeterminate (?)				Sufficient (+)				Sufficient (+)				Sufficient (+)				Insufficient (-)				Sufficient (+)				Sufficient (+)
GRADE	RoB study	Extremely serious				Very serious
	Inconsistency					Serious												Serious
	Imprecision
	Indirectness
Quality of evidence		Very low				Very low				High				High				Moderate				High				High

## Sheet: SummaryiHOT12
iHOT-12	Country (language)	Structural validity				Internal consistency				Cross-cultural validity*				Reliability				Measurement error**				Hypotheses testing				Responsiveness				Floor ceiling effect
		n	Meth. Qual.	Results (rating)	Notes	n	Meth. Qual.	Results (rating)	Notes	n	Meth. Qual.	Results (rating)	Notes	n	Meth. Qual.	Results, ICC (rating)	Notes	n	Meth. Qual.	Results: SEM, MIC (rating; individual level)	Notes	n	Meth. Qual.	Results (rating)	Notes	n	Meth. Qual.	Results (rating)	Notes
Griffin et al. 2012	UK (English)	104	Inadequate (no EFA or CFA on the short version)	No EfA or CFA on the short version despite 1 summary score	EFA on iHOT33 identified more than 4 factors (Authors wrote "at least 4 factors")					1937		36.5 to 39.3 (no SD), 43% female		104	Doubtful	0.89 (+)	Higher interval time for retest than suggested (24 days, 14 to 90 days), no evidence of stability, no ICC model stated					1833	Doubtful (stat not optimal)	1 hyp confirmed (iHOT33 vs iHOT12, r2=0.96) (+)	Mathematical coupling and spurious correlation (iHOT12 included in iHOT33) - Ref iHOT33	80	Very good	ES=0.98. No hypotheses reported but the review team hypothesised a ES <0.8 after surginal intervention. 1 hyp confirmed (+)		NA
Jonasson et al.	Sweden (Swedish)	502	Adequate (EFA)	2 factors (?, no fit indices)		502	Inadequate	0.89 (+)	CA for the whole scale but 2 factors found	502	Adequate	+		23	Adequate	0.88 (+)	GPE <20 point stable, but for pain - Sample low but not considered for the rating	23	Adequate	6.2, MIC 8.7 and 8.9 (-)	GPE <20 point stable, but for pain - Sample low but not considered for the rating	502	Very good	12 hyp confirmed (+), 1 hyp not confirmed, Phys HAGOS <0.5 (-)		502	Very good	1 hyp not confirmed, 6 items of iHOT r<0.3 with GPE (-), 1 hyp confirmed (+)		No
Baumann et al. 2016	Germany (German)					83	Very good	0.94 (+)		83	Adequate	+		46	Doubtful (evidence of stability, time interval 2 weeks but completed after 28 days, home vs clinic, recall time different: current retest, probably last month test)	0.94 (+)		46	Doubtful (evidence of stability, time interval 2 weeks but completed after 28 days, home vs clinic, recall time different: current retest, probably last month test)	6.8; MIC 14 (-)	Error in SDC calculation	83	Adequate (EQ5D clear, but not sure how to apply to this population; why expected r >0.70 with a generic instrument?; HOS has 2 subscales only but 1 correlation reported)	4 hypotheses confirmed (+), 1 not tested	Not clear 5th hyp (Ref for convergence: EQ5D, HOS, GRC)	83	Indaequate (statistic not appropriate)	No hypotheses reported and no hypotheses could be defined by the review team (?)	The only hypothesis (SDC<MIC) is wrong (criterion for agreement and not responsiveness)	No
Stevens et al. 2015 (EXCLUDED)	Netherland (Dutch)	117	Adequate	1 factor (68% variance explained) (?)		117	Very good	0.96 (+)		117	Inadequate	-		61	Adequate	0.93 (+)		61	Adequate	7.3 (?)		115	Adequate	Most of the hypotheses confirmed (+)						No
SUMMARY RESULTS		606		2 factors (?)	No fit indices	585		CA from 0.90 to 0.98 (+)		2522		+		173		ICC 0.88 to 0.94 (+)		69		SEM 6.2 to 6.8 (-)		2418		17 hyp confirmed, 1 hyp not confirmed (-)		665		2 hyp confirmed (+), 1 hyp not confirmed (-)
Overall rating		Indeterminate (?)				Sufficient (+)				Sufficient (+)				Sufficient (+)				(-)				Sufficient (+)				Indetermined (?)
GRADE	RoB study	Serious												Serious				Serious
	Inconsistency	Serious				Serious												Serious								Serious
	Imprecision
	Indirectness
Quality of evidence		Low				Moderate				High				Moderate				Low				High				Moderate

## Sheet: Characteristic of the prom
PROM (reference to first article)	Construct(s)	Target population	Context	Mode of Administration	Recall period	(Sub)scale(s) - Number of items	Response options	Range of scores	Original language	Ref Generic instrument	Ref Specific Instrument
HAGOS	Pain, Symptoms, ADL, Sport/Rec, PA, QOL	Middle-aged physically active people with long standing hip and/or groin pain	Evaluative	Self administered (hospital - home)		6 subscales: Pain (10 items), Symptoms (7 items), ADL (5 items), Sport/Rec (8 items), PA (2 items), QOL (5 items)	Likert	0 to 100 (best)	Danish	SF36, EQ5D	iHOT12
HOS	ADL and Sport	Individuals with acetabular tears	Evaluative	Self administered (hospital - home)	Past week	2 subscales:ADL (17 items), SPORT (9 items)	Likert	0 to 100 (best)	English	SF36
iHOT33	Symptoms, function, sport, occupational, QOL	young, active patients with hip disorders	Evaluative	Self administered (hospital - home)	Past month	1 scale (33 items)	VAS	0 to 100 (best)	English (what about the Swiss sample?)		NAHS
iHOT12	Symptoms, function, sport, occupational, QOL	young, active patients with hip disorders	Evaluative	Self administered (hospital - home)	Past month	1 scale (12 items)	VAS	0 to 100 (best)	English		iHOT33

## Sheet: Characteristic of population
PROM	Ref	Population				Disease characteristics		Instrument administration
		N	Age - Mean (SD, range) yr	Gender (% female)	Setting/context	Disease	Disease duration	Setting	Country	Language	Response rate
HAGOS	Thorborg et al, 2011	101	36 (11, 18-63)	0.5	Intervention not specified	Hip and groin pain	6 weeks to 12 months	Clinical, home	Denmark	Danish	50% (reliability) to 86% (responsiveness9
	Kemp et al. 2013	50	37 (11, 18-57)	0.51	post surgery (arthroscopy)	Intra-articular hip lesions	After 12 to 24 months form surgery	Clinical, home	Australia	English	NA
	Thomee et al. 2014	502	37 (13, 15-75)	0.328685	Pre andpost surgery (Arthroscopy)	FAI	NA	Clinical, home (?)	Sweden	Swedish	0.9
	Hinman et al, 2014	30	24 (4, 18-30)	0.5	Pre surgery or conservative	FAI	>2 months	NA	Australia	English	ND
	Brans et al. 2016	178	52 (14, <70)	0.05	Post Surgery (laparoscopy, open)	hernia repair	?	?	Netherland	Dutch	0.61
HOS	Martin et al. 2006	507	38 (13, 13-66)	0.538462	Post surgery (arthroscopy)	Hip labral tear	3.4 yrs	Clinical	USA	English	?
	Martin et al. 2007	107	42 (14, 14 - 79)	0.52	Post surgery (arthroscopy)	Labral tear	3.1 yrs	Home	USA	English	0.32
	Martin et al. 2008	126	41 (13, 13 to 80)	0.53	Pre and post surgery (arthroscopy)	Labral tear
	Naal et al. 2011	85	33 (12)	0.423529	Presurgery (arthroscopy and open)	FAI	?	Home	Switzerland	German	76 and 88%
	Lee et al, 2014	60	37 (SD, 16 - 80)	0.433333	presurgery (arthroscopy)	Labaral tear, FAI, snapping	?	Home, hospital (?)	Korea	Korean	?
	Polat et al, 2017	130	35 (11)	0.492308	Pre and post treatment (surgical and conservative)	Labral tear, dysplasia, FAI, various	?	Clinical	Turkey	Turkish	?
	Paula Costa et al. 2018	70	43 (13)	0.657	Intervention not specified	Fai and great trochanter pain syndrome	?	?	Brasil	Portuguese	?
	Kemp et al. 2013	50	37 (11, 18-57)	0.51	post surgery (arthroscopy)	Intra-articular hip lesions	After 12 to 24 months form surgery	Clinical, home	Australia	English	NA
	Hinman et al, 2014	30	24 (4, 18-30)	0.5	Pre surgery or conservative	FAI	>2 months	NA	Australia	English	ND
	Seija et al. 2014	100	45.1 (12.1, 18 to 65)	0.36	Pre post surgery	Hip pathology	>6 months	Clinic, home	Spain	Spanish	?
iHOT33	Mohtadi et al. 2012	27 to 150	35 to 44 (no SD, no range)	0.56	Pre and post treatment (conservtive and surgery mainly arthroscopy)	Hip pathologies	2.5 to 6.3 yrs	?	USA, Canada, UK, Switwerland	English (Switzerland, ?)	?
	Polesello et al. 2012	30	<40 yrs		?	Hip pain	?	?	Brasil	Portuguese	?
	Kemp et al. 2013	50	37 (11, 18-57)	0.51	post surgery (arthroscopy)	Intra-articular hip lesions	After 12 to 24 months form surgery	Clinical, home	Australia	English	NA
	Hinman et al, 2014	30	24 (4, 18-30)	0.5	Pre surgery or conservative	FAI	>2 months	NA	Australia	English	ND
	Ruiz-Iban et al. 2015	97	44 (11, 22 - 60)	0.381443	Pre and post surgery	FAI, OA, gluteous pathology, Perthes, dysplasia	> 6 months	Clinical, home	Spain	Spanish	0.97
	Baumann et al 2016	83	34 (12, 14-63)	0.289157	pre (?)	hip disorders	?	Clinical, home	Germany	German	?
	Tijssen et al. 2018	214	33 (9)	0.5	Pre and post surgery-conservative	Hip pathologies	?	Home	Netherland	Dutch	?
	Li et al. 2017	138	43 (11, 18-60)	0.39	Pre and post surgery	Avascular necrosis, hip dysplasia, FAI	?	?	China	Chinese	0.92
iHOT12	Griffin et al. 2012	104 to 1833	36.5 to 39.3 (no SD, no range)	0.43	Pre and post surgery	Hip pathologies	3.6 to 4.2	Clinical, home(?)	UK	English	?
	Jonasson et al. 2014	502	37 (13, 15-75)	0.328685	Pre andpost surgery (Arthroscopy)	FAI	NA	Clinical, home (?)	Sweden	Swedish	0.9
	Baumann et al 2016	83	34 (12, 14-63)	0.29	pre (?)	hip disorders	?	Clinical, home	Germany	German	?
	Stevens et al 2015	117	51 (9, 18-60)		Pre and post surgery	Hip disorders	>6 months	?	Netherland	Dutch	0.64
