# Supplementary material for: Patient-reported outcome measures for hip-related pain: a review of the available evidence and a consensus statement from the International Hip-related Pain Research Network, Zurich 2018
Source: HighWire-hosted journal article supplement (doi:10.1136/bjsports-2019-101456), 2020-02-17
Supplement: bjsports-2019-101456supp004_data_supplement.xlsx [file bjsports-2019-101456supp004_data_supplement.xlsx]

## Sheet: Box1
			HAGOS (Thorborg et al., 2012)						iHOT33 Mohtadi et al., 2012)
			Very good	Adequate	Doubtful	Inadequate	Not applicable		Very good	Adequate	Doubtful	Inadequate	Not applicable
1a. Standards for evaluating the quality of the PROM design to ensure relevance of the PROM
Relevance	#1	Is a clear description provided of the construct to be measured?				x						x
	#2	Is the origin of the construct clear: was a theory, conceptual framework or disease model used or clear rationale provided to define the construct to be measured?	x								x
	#3	Is a clear description provided of the target population for which the PROM was developed?	x						x
	#4	Is a clear description provided of the context of use?	x						x
	#5	Was the PROM development study performed in a sample representing the target population for which the PROM was developed?	x						x
	#6	Was an appropriate qualitative data collection method used to identify relevant items for a new PROM?		x						x
	#7	Were skilled group moderators/ interviewers used?			x						x
	#8	Were the group meetings or interviews based on an appropriate topic or interview guide?		x							x
	#9	Were the group meetings or interviews recorded and transcribed verbatim?			x						x
	#10	Was an appropriate approach used to analyse the data?			x						x
	#11	Was at least part of the data coded independently?			x						x
	#12	Was data collection continued until saturation was reached?		x						x
	#13	For quantitative studies (surveys): was the sample size appropriate?					x						x
1b. Standards for evaluating the quality of a cognitive interview study or other pilot test performed to evaluate comprehensibility and comprehensiveness of a PROM
Comprehensibility	#14	Was a cognitive interview study or other pilot test conducted?	x						x
	#15	Was the cognitive interview study or other pilot test performed in a sample representing the target population?	x						x
	#16	Were patients asked about the comprehensibility of the PROM?	x						x
	#17	Were all items tested in their final form?	x							x
	#18	Was an appropriate qualitative method used to assess the comprehensibility of the PROM instructions, items, response options, and recall period?			x						x
	#19	Was each item tested in an appropriate number of patients? For qualitative studies For quantitative (survey) studies	x						x
	#20	Were skilled interviewers used?			x						x
	#21	Were the interviews based on an appropriate interview guide?		x							x
	#22	Were the interviews recorded and transcribed verbatim?			x						x
	#23	Was an appropriate approach used to analyse the data?			x						x
	#24	Were at least two researchers involved in the analysis?			x						x
	#25	Were problems regarding the comprehensibility of the PROM instructions, items, response options, and recall period appropriately addressed by adapting the PROM?			x					x
Comprehensivess	#26	Were patients asked about the comprehensiveness of the PROM?	x						x
	#27	Was the final set of items tested?	x						x
	#28	Was an appropriate method used for assessing the comprehensiveness of the PROM?		x						x
	#29	Was each item tested in an appropriate number of patients? For qualitative studies For quantitative (survey) studies		x						x
	#30	Were skilled interviewers used?			x						x
	#31	Were the interviews based on an appropriate interview guide?			x						x
	#32	Were the interviews recorded and transcribed verbatim?			x						x
	#33	Was an appropriate approach used to analyse the data?			x						x
	#34	Were problems regarding the comprehensiveness of the PROM appropriately addressed by adapting the PROM?	x						x

## Sheet: QualityDevSummary
			HAGOS	iHOT
PROM design	General design requirements	Clear construct	I	I
		Origin of construct	VG	D
		Target population	VG	VG
		Context of use	VG	VG
		Representative sample	VG	VG
	Concept elicitation		D	D
	Total PROM design		D	D
Congnitive interview (CI) study	Genral design requirements	CI performed in sample representing the target population	VG	VG
	Comprehensibility		D	D
	Comprehensiveness		D	D
	Total CI study		D	D
TOTAL PROM DEVELOPMENT			D	D

## Sheet: ContentValiditySummary
	HAGOS			iHOT-33
	Development study	Rating of reviewers		Development study	Rating of reviewers
Relevance
Rating of results	±	+		±	+
Quality of evidence	Low			Low
Comprehensiveness
Rating of results	?	+		?	+
Quality of evidence	Low			Low
Comprenhensibility
Rating of results	+	+		+	+
Quality of evidence	Low			Low
Content validity
Rating of results	±	+		±	+
Quality of evidence	Low			Low
